# Supplementary material for: Anti-Oxidant, Anti-Mutagenic Activity and Safety Evaluation of Antrocin
Source: MDPI journal article supplement (doi:10.3390/toxics11060547), 2023-06-20
Supplement: s1 [file s1]

**Table S1.** Summary of pathological incidence of male rats in the side effect observation of the antrocin in the 28-day oral toxicity study.

| Organ             | Histopathological lesions                                  | Group/Male      |                        |                       |                        |
|-------------------|------------------------------------------------------------|-----------------|------------------------|-----------------------|------------------------|
|                   |                                                            | NC <sup>1</sup> | PC                     | Antrocin<br>7.5 mg/kg | Antrocin<br>37.5 mg/kg |
| Adrenal gland     |                                                            |                 |                        |                       |                        |
|                   | Congestion, cortex, multifocal, slight <sup>2</sup>        | -               | 1/5 <sup>3</sup>       | -                     | -                      |
| Aorta             |                                                            | -               | -                      | -                     | -                      |
| Brain             |                                                            |                 |                        |                       |                        |
| Bone              |                                                            |                 |                        |                       |                        |
| Femur             |                                                            |                 |                        |                       |                        |
|                   | Hypertrophy, epiphysis, diffuse, slight to moderate/severe | 0/5             | 5/5                    | 0/5                   | 0/5                    |
|                   | Score value                                                | 0               | 3.2±0.7*, <sup>4</sup> | 0                     | 0                      |
| Bone marrow       |                                                            |                 |                        |                       |                        |
| Femur             |                                                            |                 |                        |                       |                        |
|                   | Hypocellularity, diffuse, slight to moderate/severe        | 0/5             | 3/5                    | 0/5                   | 0/5                    |
|                   | Score value                                                | 0               | 1.8±1.5*               | 0                     | 0                      |
| Sternum           |                                                            |                 |                        |                       |                        |
|                   | Hypocellularity, diffuse, moderate                         | 0/5             | 3/5                    | 0/5                   | 0/5                    |
|                   | Score value                                                | 0               | 1.8±1.5*               | 0                     | 0                      |
| Coagulative gland |                                                            | -               | -                      | -                     | -                      |
| Epididymis        |                                                            |                 |                        |                       |                        |
|                   | Granuloma, spermatic, focal, moderate                      | -               | 1/5                    | -                     | -                      |
| Esophagus         |                                                            | -               | -                      | -                     | -                      |
| Eyes              |                                                            | -               | -                      | -                     | -                      |
| Harderian gland   |                                                            | -               | -                      | -                     | -                      |
| Heart             |                                                            |                 |                        |                       |                        |
|                   | Infiltration, mononuclear cell, focal, minimal to slight   | 1/5             | 1/5                    | 1/5                   | 1/5                    |
| Intestine, small  |                                                            |                 |                        |                       |                        |
| Duodenum          |                                                            | -               | -                      | -                     | -                      |
| Jejunum           |                                                            | -               | -                      | -                     | -                      |
| Ileum             |                                                            | -               | -                      | -                     | -                      |
| Intestine, large  |                                                            |                 |                        |                       |                        |
| Caecum            |                                                            | -               | -                      | -                     | -                      |
| Colon             |                                                            | -               | -                      | -                     | -                      |

| Organ             | Histopathological lesions                                   | Group/Male      |          |                       |                        |
|-------------------|-------------------------------------------------------------|-----------------|----------|-----------------------|------------------------|
|                   |                                                             | NC <sup>1</sup> | PC       | Antrocin<br>7.5 mg/kg | Antrocin<br>37.5 mg/kg |
| Rectum            |                                                             | -               | -        | -                     | -                      |
| Kidney            |                                                             |                 |          |                       |                        |
|                   | Cast, tubule, focal, minimal                                | 1/5             | 3/5      | -                     | -                      |
|                   | Cyst, tubule, focal, slight                                 | -               | -        | 1/5                   | -                      |
|                   | Infarct, tubule, focal, slight                              | -               | -        | 2/5                   | 1/5                    |
| Liver             |                                                             | -               | -        | -                     | -                      |
| Lung              |                                                             | -               | -        | -                     | -                      |
| Lymph node        |                                                             | -               | -        |                       |                        |
| Cervical          |                                                             | -               | -        | -                     | -                      |
| Mesenteric        |                                                             | -               | -        | -                     | -                      |
| Mammary gland     |                                                             | -               | -        | -                     | -                      |
| Optic nerve       |                                                             | -               | -        | -                     | -                      |
| Pancreas          |                                                             | -               | -        | -                     | -                      |
| Pituitary         |                                                             | -               | -        | -                     | -                      |
| Parathyroid gland |                                                             | -               | -        | -                     | -                      |
| Prostate gland    |                                                             |                 |          |                       |                        |
|                   | Infiltration, mononuclear cell, focal,<br>minimal to slight | 1/5             | -        | -                     | 2/5                    |
| Salivary gland    |                                                             |                 |          |                       |                        |
| Mandibular lobe   |                                                             | -               | -        | -                     | -                      |
| Sublingual lobe   |                                                             | -               | -        | -                     | -                      |
| Sciatic nerve     |                                                             | -               | -        | -                     | -                      |
| Seminal vesicle   |                                                             | -               | -        | -                     | -                      |
| Skeletal muscle   |                                                             | -               | -        | -                     | -                      |
| Skin              |                                                             | -               | -        | -                     | -                      |
| Spinal cord       |                                                             | -               | -        | -                     | -                      |
| Spleen            | Atrophy, red pulp, diffuse, slight to<br>moderate           | 0/5             | 5/5      | 0/5                   | 0/5                    |
|                   | Score value                                                 | 0               | 2.2±0.4* | 0                     | 0                      |
| Stomach           |                                                             | -               | -        | -                     | -                      |
| Testis            |                                                             | -               | -        | -                     | -                      |
| Thymus            |                                                             | -               | -        | -                     | -                      |
| Thyroid gland     |                                                             | -               | -        | -                     | -                      |
| Tongue            |                                                             | -               | -        | -                     | -                      |
| Trachea           |                                                             | -               | -        | -                     | -                      |

| Organ           | Histopathological lesions | Group/Male      |    |                       |                        |
|-----------------|---------------------------|-----------------|----|-----------------------|------------------------|
|                 |                           | NC <sup>1</sup> | PC | Antrocin<br>7.5 mg/kg | Antrocin<br>37.5 mg/kg |
| Urinary bladder |                           | -               | -  | -                     | -                      |

<sup>1</sup> NC: negative control (olive oil); PC: positive control (sorafenib 7.5 mg/kg); -: No significant lesion. <sup>2</sup> Degree of lesions was graded from one to five depending on severity: 1 = minimal (< 1%); 2 = slight (1-25%); 3 = moderate (26-50%); 4 = moderate/severe (51-75%); 5 = severe/high (76-100%). <sup>3</sup> Incidence: Affected rats/ Total examined rats (n = 5). <sup>4</sup> The final numerical score was calculated by dividing the sum of the number per grade of affected rats by the total number of examined rats. \* Significant difference between the control and treatment groups at  $p < 0.05$ .

**Table S2.** Summary of pathological incidence of female rats in the side effect observation of the antrocin in the 28-day oral toxicity study.

| Organ            | Histopathological lesions                                      | Group/Female    |                        |                       |                        |
|------------------|----------------------------------------------------------------|-----------------|------------------------|-----------------------|------------------------|
|                  |                                                                | NC <sup>1</sup> | PC                     | Antrocin<br>7.5 mg/kg | Antrocin<br>37.5 mg/kg |
| Adrenal gland    |                                                                |                 |                        |                       |                        |
|                  | Congestion, cortex, focal, slight <sup>2</sup>                 | -               | 1/5 <sup>3</sup>       | -                     | -                      |
| Aorta            |                                                                | -               | -                      | -                     | -                      |
| Brain            |                                                                |                 |                        |                       |                        |
| Bone             |                                                                |                 |                        |                       |                        |
| Femur            |                                                                |                 |                        |                       |                        |
|                  | Hypertrophy, epiphysis, diffuse,<br>slight to moderate/severe  | 0/5             | 5/5                    | 0/5                   | 0/5                    |
|                  | Score value                                                    | 0               | 3.2±0.4 <sup>*,4</sup> | 0                     | 0                      |
| Bone marrow      |                                                                |                 |                        |                       |                        |
| Cervix           |                                                                | -               | -                      | -                     | -                      |
| Esophagus        |                                                                | -               | -                      | -                     | -                      |
| Eyes             |                                                                | -               | -                      | -                     | -                      |
| Harderian gland  |                                                                |                 |                        |                       |                        |
|                  | Infiltration, mononuclear cell,<br>focal, minimal              | -               | -                      | -                     | 1/5                    |
| Heart            |                                                                | -               | -                      | -                     | -                      |
| Intestine, small |                                                                |                 |                        |                       |                        |
| Intestine, large |                                                                |                 |                        |                       |                        |
| Kidney           |                                                                |                 |                        |                       |                        |
|                  | Cast, tubule, focal, slight                                    | -               | 1/5                    | -                     | -                      |
|                  | Cyst, tubule, focal, slight                                    | 1/5             | -                      | -                     | -                      |
|                  | Infarct, tubule, focal, slight                                 | -               | 1/5                    | -                     | -                      |
| Liver            |                                                                |                 |                        |                       |                        |
|                  | Fatty change, multifocal, slight                               | -               | -                      | 1/5                   | -                      |
| Lung             |                                                                | -               | -                      | -                     | -                      |
| Lymph node       |                                                                |                 |                        |                       |                        |
| Mammary gland    |                                                                | -               | -                      |                       |                        |
| Optic nerve      |                                                                | -               | -                      | -                     | -                      |
| Ovary            |                                                                |                 |                        |                       |                        |
|                  | Increase, follicle, multifocal,<br>moderate to moderate/severe | 0/5             | 4/4                    | 0/5                   | 0/5                    |

| Organ             | Histopathological lesions                        | Group/Female    |            |                       |                        |
|-------------------|--------------------------------------------------|-----------------|------------|-----------------------|------------------------|
|                   |                                                  | NC <sup>1</sup> | PC         | Antrocin<br>7.5 mg/kg | Antrocin<br>37.5 mg/kg |
|                   | Total counted number of well-developed follicles | 10.2±1.9        | 44.2±15.6* | 12.6±6.1              | 10.8±4.8               |
| Oviduct           |                                                  | -               | -          | -                     | -                      |
| Pancreas          |                                                  | -               | -          | -                     | -                      |
| Pituitary         |                                                  | -               | -          | -                     | -                      |
| Parathyroid gland |                                                  | -               | -          | -                     | -                      |
| Salivary gland    |                                                  | -               | -          | -                     | -                      |
| Sciatic nerve     |                                                  | -               | -          | -                     | -                      |
| Skeletal muscle   |                                                  | -               | -          | -                     | -                      |
| Skin              |                                                  | -               | -          | -                     | -                      |
| Spinal cord       |                                                  | -               | -          | -                     | -                      |
| Spleen            |                                                  | -               | -          | -                     | -                      |
| Stomach           |                                                  | -               | -          | -                     | -                      |
| Thymus            |                                                  | -               | -          | -                     | -                      |
| Thyroid gland     |                                                  | -               | -          | -                     | -                      |
| Tongue            |                                                  | -               | -          | -                     | -                      |
| Trachea           |                                                  | -               | -          | -                     | -                      |
| Urinary bladder   |                                                  | -               | -          | -                     | -                      |
| Uterus            |                                                  | -               | -          | -                     | -                      |
| Vagina            |                                                  | -               | -          | -                     | -                      |

<sup>1</sup> NC: negative control (olive oil); PC: positive control (sorafenib 7.5 mg/kg); -: No significant lesion.<sup>2</sup> Degree of lesions was graded from one to five depending on severity: 1 = minimal (< 1%); 2 = slight (1-25%); 3 = moderate (26-50%); 4 = moderate/severe (51-75%); 5 = severe/high (76-100%).<sup>3</sup> Incidence: Affected rats/ Total examined rats (n = 5).<sup>4</sup> The final numerical score was calculated by dividing the sum of the number per grade of affected rats by the total number of examined rats. \* Significant difference between the control and treatment groups at  $p < 0.05$ .
